# Supplementary material
Source: PubMed Central journal article supplement (PMC7773381)
Supplement: jci-131-139617-s627.pdf [file jci-131-139617-s627.pdf]

## Supplemental Data

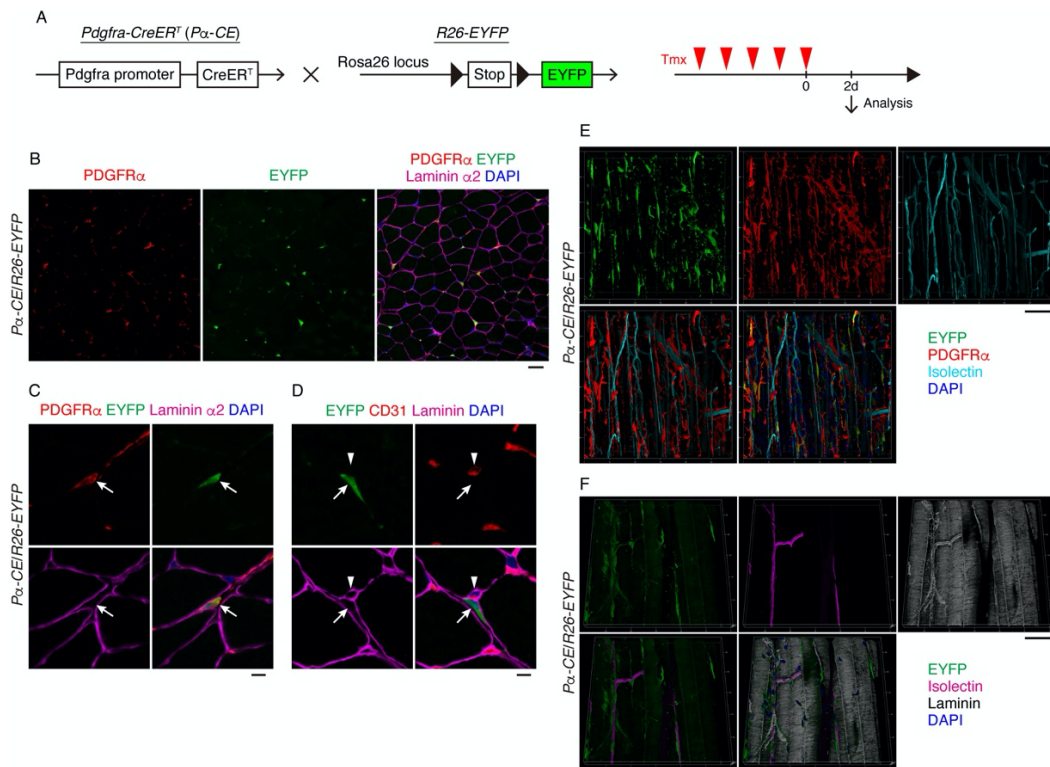

### Supplemental Figure 1. Specific recombination in mesenchymal progenitors induced in the *Pdgfra-CreER* mice

(A) Generation of *Pα-CE/R26-EYFP* mice.

(B–D) Immunofluorescence staining of *Pα-CE/R26-EYFP* muscle for PDGFR $\alpha$ , EYFP, and laminin  $\alpha$ 2 (B, C) and EYFP, CD31, and laminin (D). Note that specific recombination was induced in PDGFR $\alpha$ <sup>+</sup> cells, which were localized outside the basal lamina. Arrows indicate mesenchymal progenitors located in interstitial space, and arrowheads indicate capillaries surrounded by a basal lamina.

(E and F) Whole-mount immunofluorescence staining of *Pα-CE/R26-EYFP* EDL muscle for EYFP and PDGFR $\alpha$  (E), and EYFP and Laminin (F). Fluorescently-labeled isolectin was used to visualize vasculature. Scale bars, 20  $\mu$ m (B), 5  $\mu$ m (C, D), and 50  $\mu$ m (E, F).

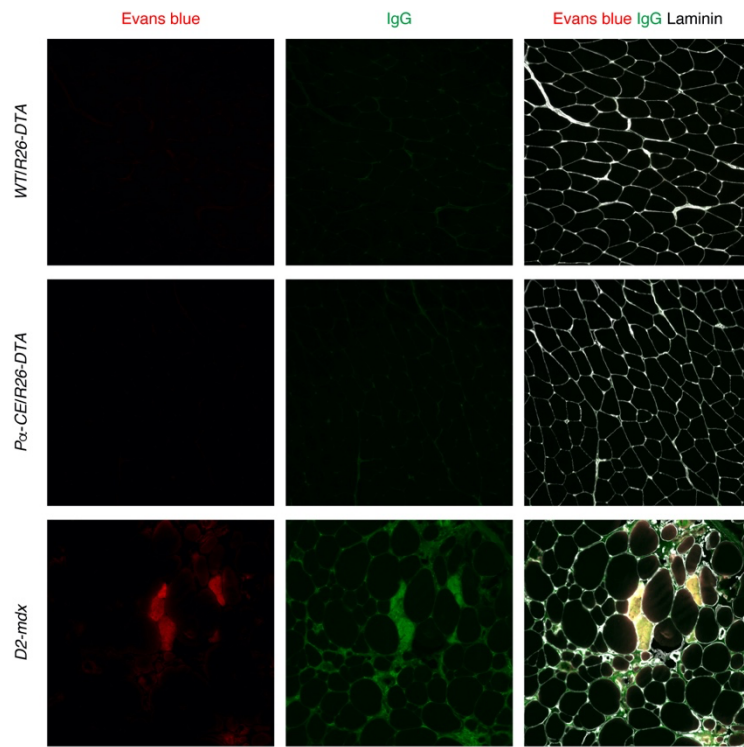

**Supplemental Figure 2. Mesenchymal progenitor depletion does not damage myofibers**

Fluorescence images of Evans blue dye, IgG, and laminin. *D2-mdx* mice were used as a positive control for the assessment of myofiber damage. Scale bar, 100  $\mu$ m.

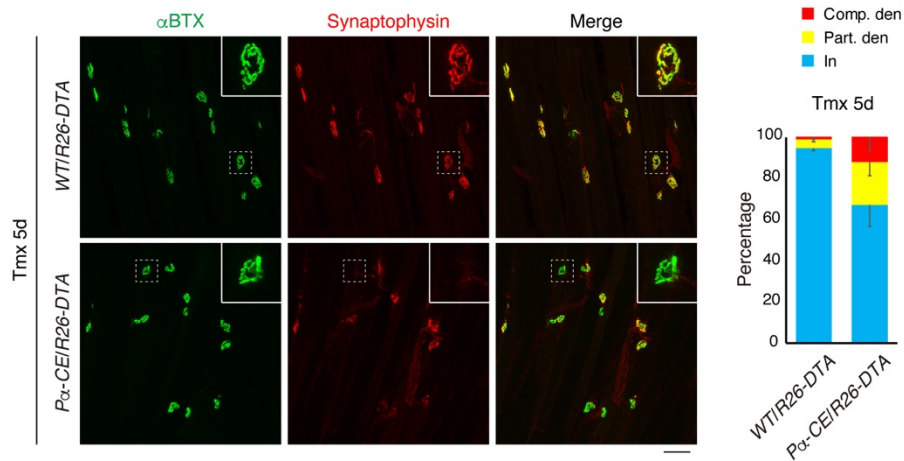

### Supplemental Figure 3. NMJ status after mesenchymal progenitor depletion

Fluorescence images of acetylcholine receptor ( $\alpha$ BTX) and synaptophysin. Insets show magnified images of boxed regions. Ratios of completely denervated (Comp. den), partially denervated (Part. den), and innervated (In) NMJ were calculated at 5 days after Tmx treatment.  $n = 4$  for *WT/R26-DTA*,  $n = 6$  for *Pα-CE/R26-DTA*.

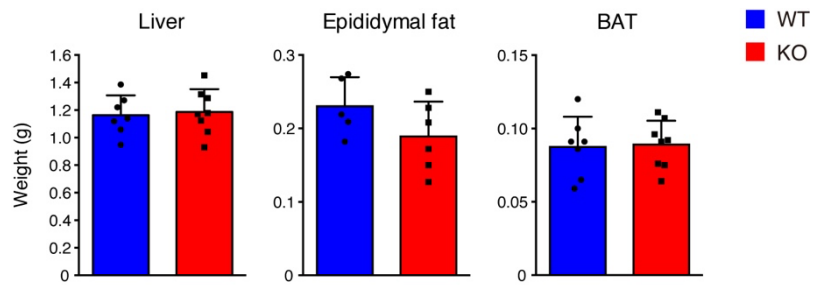

**Supplemental Figure 4. Liver weight and adipose tissue weight of *Bmp3b* KO mice are comparable with those of WT mice**

Liver, epididymal fat, and scapular brown adipose tissue (BAT) were dissected from *Bmp3b* KO or WT mice. The weight of each tissue was measured. Liver and BAT:  $n = 7$  for WT,  $n = 8$  for KO. Epididymal fat:  $n = 5$  for WT,  $n = 6$  for KO mice. Data represent the means  $\pm$  SD; two-sided unpaired t-test.

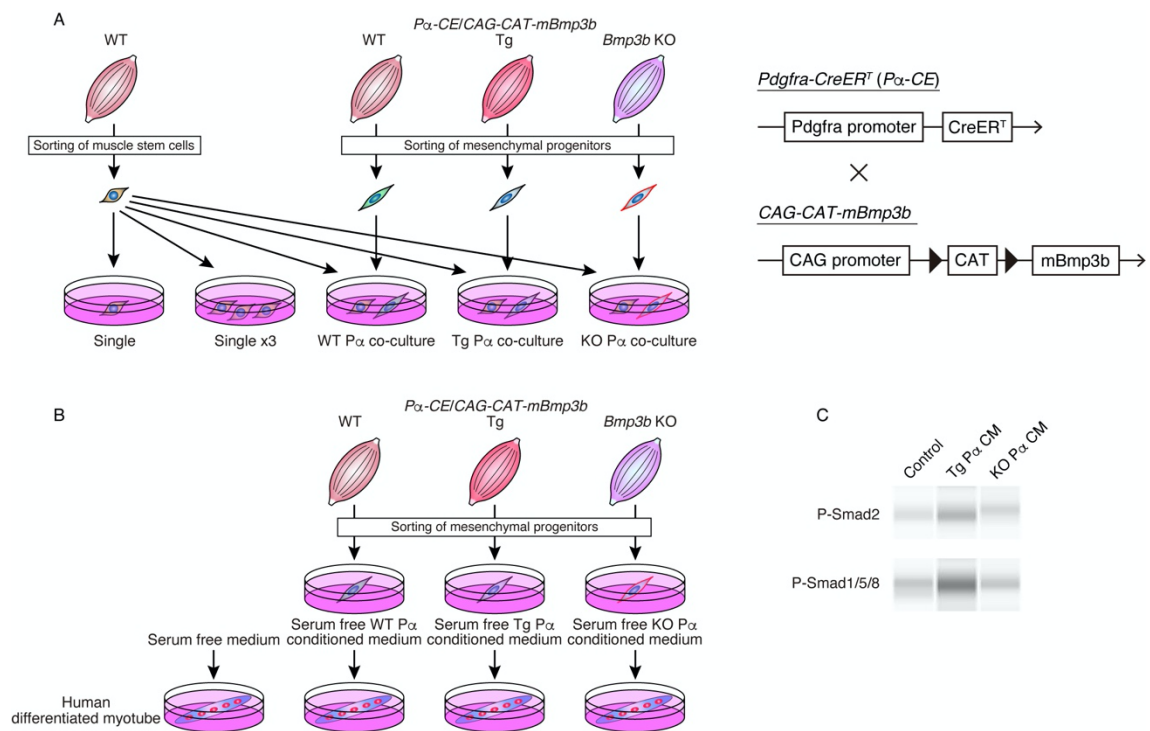

**Supplemental Figure 5. Culture experiments to assess the effect of *Bmp3b* derived from mesenchymal progenitors on muscle cells**

- (A) Scheme of the co-culture experiments and generation of *Pα/Bmp3b* Tg mice.
- (B) Scheme of the culture experiments using the conditioned medium.
- (C) Phosphorylation of Smad2 and Smad1/5/8 after treatment with the conditioned medium was analyzed by capillary-based immunoassay.

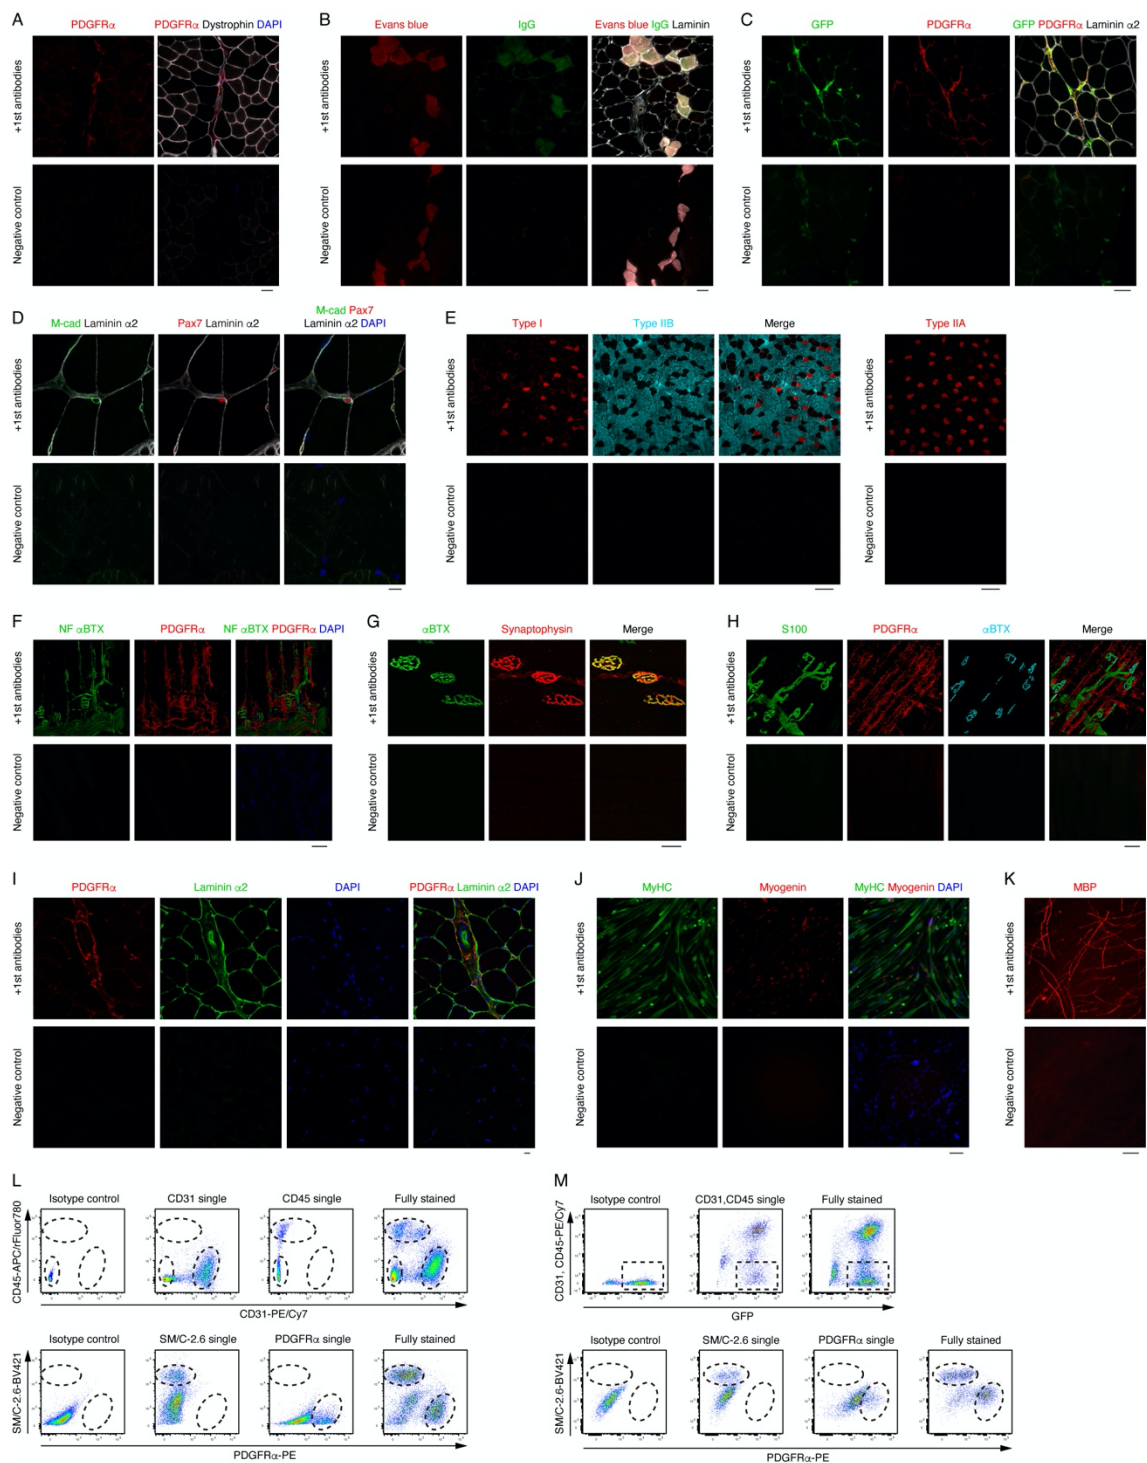

## Supplemental Figure 6. Negative immunostaining controls

(A) Immunostaining for PDGFR $\alpha$  and dystrophin (upper panels), and negative control staining (lower panels). (Related to Figure 1B). (B) Immunostaining for mouse IgG and

laminin (upper panels), and negative control staining (lower panels). Evans blue fluorescence was detected in both positive and negative staining sections. (Related to Supplemental Figure 2). (C) Immunostaining for GFP, PDGFR $\alpha$ , and laminin  $\alpha$ 2 (upper panels), and negative control staining (lower panels). (Related to Figure 2H). (D) Immunostaining for M-cadherin (M-cad), Pax7, and laminin  $\alpha$ 2 (upper panels), and negative control staining (lower panels). (Related to Figure 3A). (E) Immunostaining for type I, IIB, and IIA myosin heavy chain (upper panels) and negative control staining (lower panels). (Related to Figure 3B and 6E). (F) Immunostaining for neurofilament (NF), acetylcholine receptor ( $\alpha$ BTX), and PDGFR $\alpha$  (upper panels), and negative control staining (lower panels). (Related to Figure 4A). (G) Immunostaining for acetylcholine receptor ( $\alpha$ BTX), synaptophysin (upper panels), and negative control staining (lower panels). (Related to Figure 4B and 6G). (H) Immunostaining for S100, PDGFR $\alpha$ , and acetylcholine receptor ( $\alpha$ BTX) (upper panels), and negative control staining (lower panels). (Related to Figure 4C and 6H). (I) Immunostaining for PDGFR $\alpha$  and laminin  $\alpha$ 2 (upper panels) and negative control staining (lower panels). (Related to Figure 5A). (J) Immunostaining for myosin heavy chain (MyHC) and myogenin (upper panels), and negative control staining (lower panels). (Related to Figure 7A-C). (K) Immunostaining for myelin basic protein (MBP) (upper panels) and negative control staining (lower panels). (Related to Figure 8B). (L and M) Isotype and single staining controls for FACS experiments. (Related to Figure 1D and 5B [L], and 2G [M]). Scale bars, 30  $\mu$ m (A-C, G), 10  $\mu$ m (D, I), 100  $\mu$ m (E), 50  $\mu$ m (F, H), 75  $\mu$ m (J), and 25  $\mu$ m (K).

**Supplemental Table 1.** List of genes that were specifically expressed in mesenchymal progenitors and downregulated in mesenchymal progenitor-depleted muscle and aged mesenchymal progenitors

| Symbol               | RefSeq    | WT/<br>R26-DTA | P $\alpha$ -CE/<br>R26-DTA | Young      |     |               | Aged       |      |               | Gene Ontology (Molecular function)                                                                                                                                                                                                                                                                                                                                                                                                                                |
|----------------------|-----------|----------------|----------------------------|------------|-----|---------------|------------|------|---------------|-------------------------------------------------------------------------------------------------------------------------------------------------------------------------------------------------------------------------------------------------------------------------------------------------------------------------------------------------------------------------------------------------------------------------------------------------------------------|
|                      |           |                |                            | P $\alpha$ | SC  | CD31,<br>CD45 | P $\alpha$ | SC   | CD31,<br>CD45 |                                                                                                                                                                                                                                                                                                                                                                                                                                                                   |
| <b>Kera</b>          | NM_008438 | 329            | 91                         | 1805       | 71  | 25            | 196        | 69   | 10            | -                                                                                                                                                                                                                                                                                                                                                                                                                                                                 |
| <b>Wfdc1</b>         | NM_023395 | 983            | 390                        | 456        | 16  | 97            | 150        | 26   | 201           | peptidase inhibitor activity; serine-type endopeptidase inhibitor activity                                                                                                                                                                                                                                                                                                                                                                                        |
| <b>Il1ra1</b>        | NM_010549 | 9              | 3                          | 213        | 10  | 2             | 80         | 9    | 2             | cytokine binding; cytokine receptor activity; interleukin-11 binding; interleukin-11 receptor activity                                                                                                                                                                                                                                                                                                                                                            |
| <b>Gdf10</b>         | NM_145741 | 54             | 14                         | 805        | 2   | 5             | 306        | 11   | 3             | cytokine activity; growth factor activity                                                                                                                                                                                                                                                                                                                                                                                                                         |
| <b>Nmb</b>           | NM_026523 | 211            | 29                         | 847        | 17  | 44            | 363        | 16   | 38            | neuromedin B receptor binding; neuropeptide hormone activity                                                                                                                                                                                                                                                                                                                                                                                                      |
| <b>Glt8d2</b>        | XM_483930 | 21             | 6                          | 267        | 7   | 2             | 123        | 20   | 4             | transferase activity; transferase activity, transferring glycosyl groups                                                                                                                                                                                                                                                                                                                                                                                          |
| <b>Col1a2</b>        | NM_007743 | 2286           | 851                        | 18341      | 554 | 228           | 9027       | 1591 | 116           | SMAD binding; extracellular matrix structural constituent; extracellular matrix structural constituent conferring tensile strength; identical protein binding; metal ion binding; platelet-derived growth factor binding; protease binding; protein binding; protein binding, bridging                                                                                                                                                                            |
| <b>1500015O10Rik</b> | NM_024283 | 56             | 20                         | 663        | 44  | 6             | 328        | 170  | 5             | G1 to G0 transition; anaphase-promoting complex-dependent catabolic process; cellular senescence; central nervous system development; negative regulation of cell proliferation; neuropeptide signaling pathway; positive regulation of corticosterone secretion; positive regulation of corticotropin secretion; positive regulation of corticotropin-releasing hormone secretion; regulation of cell proliferation; response to wounding; vasopressin secretion |

P $\alpha$ -CE: Pdgfra-CreER<sup>T</sup>, P $\alpha$ : PDGFR $\alpha$ <sup>+</sup> cells, SC: Satellite cells, CD31, CD45: CD31<sup>+</sup> or CD45<sup>+</sup> cells  
 Normalized gene expression values of each sample are presented.



**Supplemental Table 2**

## Primary antibodies

| Antibody                           | Clone      | Conjugate(s)<br>Used | Dilution        | Source, catalog<br>number                  |
|------------------------------------|------------|----------------------|-----------------|--------------------------------------------|
| rat anti-CD31                      | 390        | PE/Cy7               | 1:200           | BioLegend                                  |
| rat anti-CD45                      | 30-F11     | PE/Cy7               | 1:200           | BioLegend                                  |
| rat anti-CD45                      | 30-F11     | APC-eFluor<br>780    | 1:200           | Thermo Fisher<br>Scientific                |
| rat anti-Satellite<br>cells        | SM/C-2.6   | biotin               | 1:200           | A gift from S.<br>Fukada <sup>(1)</sup>    |
| goat anti-PDGFR $\alpha$           | polyclonal | unconjugated         | 2.5 $\mu$ g/ml  | R&D, AF1062                                |
| goat anti-PDGFR $\alpha$           | polyclonal | PE                   | 15 $\mu$ l/test | R&D, FAB1062P                              |
| rabbit anti-Laminin                | polyclonal | unconjugated         | 1:400           | Sigma, L9393                               |
| rat anti-Laminin $\alpha$ 2        | 4H8-2      | unconjugated         | 1:400           | Santa Cruz<br>Biotechnology                |
| rabbit anti-M-<br>cadherin         | polyclonal | unconjugated         | 1:800           | A gift from S.<br>Takeda <sup>(2)</sup>    |
| mouse anti-Pax7                    | PAX7       | unconjugated         | 1:2             | DSHB                                       |
| rabbit anti-GFP                    | polyclonal | unconjugated         | 1:800           | MBL, 598                                   |
| goat anti-GFP                      | polyclonal | unconjugated         | 1:200           | OriGene, AB0020                            |
| rabbit anti-<br>Dystrophin         | polyclonal | unconjugated         | 1:800           | Abcam, ab15277                             |
| mouse anti-Type I<br>MyHC          | NOQ7.5.4D  | unconjugated         | 1:200           | Sigma                                      |
| mouse anti-Type IIA<br>MyHC        | SC-71      | unconjugated         | 1:200           | Developmental<br>Studies<br>Hybridoma Bank |
| mouse anti-Type IIB<br>MyHC        | BF-F3      | unconjugated         | 1:10            | Developmental<br>Studies<br>Hybridoma Bank |
| mouse anti-<br>Neurofilament       | SMI312     | unconjugated         | 1:1000          | BioLegend                                  |
| rabbit anti-<br>Synaptophysin      | polyclonal | unconjugated         | 1:200           | Abcam, ab14692                             |
| rabbit anti-S100                   | polyclonal | unconjugated         | 1:2             | Dako, IS504                                |
| mouse anti-MyHC                    | MF-20      | unconjugated         | 1:2             | Developmental<br>Studies<br>Hybridoma Bank |
| mouse anti-Myelin<br>basic protein | SMI99      | unconjugated         | 1:2000          | BioLegend                                  |

|                                                |       |                        |        |                                                |
|------------------------------------------------|-------|------------------------|--------|------------------------------------------------|
| $\alpha$ -Bungarotoxin                         |       | Alexa 488,<br>Alexa647 | 1:1000 | Thermo Fisher<br>Scientific,<br>B13422, B35450 |
| rabbit anti-phospho-<br>Smad2                  | 138D4 | unconjugated           | 1:1000 | Cell Signaling                                 |
| rabbit anti-phospho-<br>Smad1/ Smad5/<br>Smad9 | D5B10 | unconjugated           | 1:1000 | Cell Signaling                                 |
| rabbit anti- phospho-<br>Akt                   | D9E   | unconjugated           | 1:2000 | Cell Signaling                                 |
| Isolectin GS-IB <sub>4</sub>                   |       | Alexa 647              | 1:100  | Thermo Fisher<br>Scientific, I32450            |

#### Secondary reagents used

| Secondary Reagent                 | Conjugate(s)<br>Used                  | Dilution | Source           |
|-----------------------------------|---------------------------------------|----------|------------------|
| streptavidin                      | BV421                                 | 1:200    | BioLegend        |
| donkey polyclonal anti-goat IgG   | Alexa 568                             | 1:1000   | Molecular Probes |
| donkey polyclonal anti-mouse IgG  | Alexa 488,<br>Alexa 568               | 1:1000   | Molecular Probes |
| donkey polyclonal anti-rabbit IgG | Alexa 488,<br>Alexa 568,<br>Alexa 647 | 1:1000   | Molecular Probes |
| chicken polyclonal anti-rat IgG   | Alexa 647                             | 1:1000   | Molecular Probes |
| donkey polyclonal anti-mouse IgG1 | Alexa 555                             | 1:1000   | Molecular Probes |
| donkey polyclonal anti-mouse IgM  | Alexa 647                             | 1:1000   | Molecular Probes |
| goat polyclonal anti-rabbit IgG   | HRP                                   | 1:3000   | Cell Signaling   |

### Supplemental Table 3

#### Primer sequences

| Gene          | Forward                       | Reverse                       | Size |
|---------------|-------------------------------|-------------------------------|------|
| mouse Fbxo32  | 5' GCAGAGAGTCGGCAAGTCTG 3'    | 5' GTAAGCACACAGGCAGGTCG 3'    | 155  |
| mouse Jun     | 5' GTCTCAGGAGCGGATCAAGG 3'    | 5' TGCGCTTTCAAGGTTTTTTCAC 3'  | 126  |
| mouse Sox2    | 5' GACCAGCTCGCAGACCTACA 3'    | 5' CCTCGACTTGACCACAGAG 3'     | 113  |
| mouse Id2     | 5' AGTCCGGTGAGGTCCGTTAG 3'    | 5' ACCAGTTCCTTGAGCTGGAG 3'    | 137  |
| mouse Mbp     | 5' AGACCCTCACAGCGATCCAA 3'    | 5' CCCGATGGAGTCAAGGATG 3'     | 108  |
| mouse Gjb1    | 5' CGGCTGGTCAAGTGTGAAG 3'     | 5' GGCTGCGAGCATAAAGACAG 3'    | 102  |
| mouse Cmas    | 5' CAAAGGCATCCCCTGAAGA 3'     | 5' CCCACACACTCTGGAAGACC 3'    | 104  |
| mouse Bmp3b   | 5' CTTTGACGCCTACTACTGTGCTG 3' | 5' AAGGGAGTTCATCTTGTCTGGAA 3' | 157  |
| mouse Hsbp1   | 5' CAAGACCATGCAGGACATCAC 3'   | 5' AGGTCAGCGATATTCTTCTCCA 3'  | 147  |
| human BMP3B   | 5' CGGCTGGAATGAATGGATAA 3'    | 5' TGACAATGCTCTGGATGGTG 3'    | 125  |
| human NDUFA13 | 5' CGTCAAAGGTGAAGCAGGAC 3'    | 5' CTCCAGTGCCCGTAGATCAG 3'    | 139  |
| rat Jun       | 5' TGGGCACATCACCCTACAC 3'     | 5' GCGTATTCTGGCTATGCAGTTC 3'  | 125  |
| rat Mbp       | 5' AGAGACCCTCACAGCGACAC 3'    | 5' CCCGATGGAGTCAAGGATG 3'     | 116  |
| rat Egr2      | 5' TCTGCGCCTAGAAACCAGAC 3'    | 5' CAGAGGTGACGCTGGAAGAG 3'    | 169  |
| rat GAPDH     | 5' ATGGCCTTCCGTGTTCTAC 3'     | 5' CCTGCTTACCACCTTCTTG 3'     | 103  |

#### References for Supplemental Data

1. Fukada S, Higuchi S, Segawa M, Koda K, Yamamoto Y, Tsujikawa K, et al. Purification and cell-surface marker characterization of quiescent satellite cells from murine skeletal muscle by a novel monoclonal antibody. *Exp Cell Res*. 2004;296(2):245-55.
2. Ojima K, Uezumi A, Miyoshi H, Masuda S, Morita Y, Fukase A, et al. Mac-1(low) early myeloid cells in the bone marrow-derived SP fraction migrate into injured skeletal muscle and participate in muscle regeneration. *Biochem Biophys Res Commun*. 2004;321(4):1050-61.
